# Supplementary material for: Using an eHealth Intervention to Stimulate Health Behavior for the Prevention of Cognitive Decline in Dutch Adults: A Study Protocol for the Brain Aging Monitor
Source: PubMed Central journal article supplement (PMC4704922; doi:10.2196/resprot.4468), 2015-11-10
Supplement: resprot_v4i4e130_app1.pdf [file resprot_v4i4e130_app1.pdf]

1 **Multimedia Appendix 1. Translated version of the Informed Consent**

2 **form**

3 Informed Consent form

4

5 The Brain Aging Monitor is a study about the brain of the Radboudumc in Nijmegen. The results of  
6 the research will be used to learn more about the workings of the brain.

7

8 We therefore ask you to agree that we use your answers to the questionnaires and measurement  
9 results. If you agree, you can participate in the Brain Aging Monitor program. Before you agree, you  
10 must have read the written information about what the research entails. This information is  
11 provided below:

12

13 What is the Brain Aging Monitor ?

14

15 The Brain Aging Monitor is a lifestyle program developed by the Radboudumc. The Brain Aging  
16 Monitor (BAM) gives you insight in your lifestyle, makes you more aware of your behavior and  
17 supports you in making healthy choices. The BAM supports you in acquiring and maintaining  
18 healthy behaviors. For example, exercise, diet , alcohol consumption and smoking . But also sleep  
19 and relaxation.

20

21 The BAM challenges participants to live healthy and responsible. You will gain insight in your own  
22 lifestyle. The BAM compares your personal lifestyle to the standards for healthy living by the World  
23 Health Organization and the National Food Centre. Based on these results you set personal and

24 achievable monthly goals. The BAM provides you with a number of tools that make it easier to  
25 achieve your goals. For example, the BAM uses monitoring systems for the amount of exercise  
26 performed or the number of units of alcohol you have drunk. On the basis of this information, the  
27 BAM gives you insight into your progress to reach your goals.

28

29 In order to combine the performance of your brain with these lifestyle changes, the Radboudumc  
30 has specially developed a new online self monitor for cognitive performance for the BAM. We  
31 developed a new way of using online puzzles. Thus, the BAM can map your memory and planning  
32 ability over the course of time. When we link the data about healthy living and your brain aging we  
33 can draw conclusions about how healthy living affects brain aging.

34

35 The BAM is the subject of Teun Aalbers' PhD thesis. Aalbers is a PhD at the Department of  
36 Geriatric Medicine at the Radboudumc. For his study he tries to answer two questions. The first  
37 question is "What is the effect of a healthy lifestyle on the aging process of our brain?". The second  
38 question is "Is it possible to support participants in making healthy lifestyle choices using a  
39 standalone website?". The BAM therefore aims to follow you for two years. This may seem very long  
40 at first. But breaking unhealthy habits and patterns is not easy. Especially since we're interested in  
41 observing if health behavior changes persist over time and become new healthy habits we need to  
42 follow you for a longer period of time. Furthermore, the decline of cognitive functions during our  
43 lifespan is a slow and gradual process. To see if making healthy behavioral choices influences this  
44 gradual decline the follow up period needs to be several years.

45

46 In order to optimally do this the BAM administers a number of questionnaires. These  
47 questionnaires are about your current lifestyle. In addition, the BAM asks you a number of

48 questions that maps your perspective on behavior change and how you cope with difficult situations.  
49 This way, over the course of time, we can see if participants who deal with difficult situations in  
50 different ways also change their behavior in different ways.

51

52 The BAM also asks you to play four puzzle games. This allows us to globally map the performance of  
53 your brain. By repeating these games after one year and two years we see how and if you have  
54 changed.

55 We hope that you continue to take part in the study for the duration of at least two years. However,  
56 you are free to stop your participation in the study at any given moment in time without providing  
57 an explanation. This can be done by clicking the "unsubscribe" button on your personal profile.  
58 After this you will receive no further information from the Brain Aging Monitor.

59

60 Your information will be kept strictly confidential by the BAM and Radboudumc . Your personal  
61 information will not be provided or released to any third party under any circumstances. All your  
62 data is treated and analyzed anonymously and will in no way be traced back to your person. If you  
63 participate in the BAM through your employer, your employer will not receive feedback on your  
64 results that can be traced to your person. Anonymous results will only be provided when there are  
65 sufficient participants from the same employer participating to guarantee anonymity.

66

67 If, for whatever reason, you are under the care or supervision of a physician, dietitian, physical  
68 therapist or other health care professional, you need to follow the advice you have been given by this  
69 health care professional at all times. If the advice of the BAM are contradictory to the advice you  
70 receive from your therapist, you can discuss this with said health care professional. The advice of

71 your therapist, however, is completely customized to your situation. So always follow the advice of  
72 your health care professional over advice by the BAM.

73

74 1. I have read the written information concerning the study

75 2. I am satisfactorily informed about the study

76 3. I have had time to think about my participation in the study

77 4. I know that participation is completely voluntary. I know I can decide not to participate at any  
78 given moment in time. I don't need to provide a reason for my discontinuation of the study.

79 5. I give the administrators of the Brain Aging Monitor permission to access my account when I  
80 request assistance.

81

82 I hereby consent to the use of my data for scientific purposes, provided that my privacy is  
83 guaranteed:

84  Yes, I have read the informed consent of the Brain Aging Monitor and agree to these terms.

85
