# Supplementary material for: Using an eHealth Intervention to Stimulate Health Behavior for the Prevention of Cognitive Decline in Dutch Adults: A Study Protocol for the Brain Aging Monitor
Source: PubMed Central journal article supplement (PMC4704922; doi:10.2196/resprot.4468), 2015-11-10
Supplement: resprot_v4i4e130_app3.pdf [file resprot_v4i4e130_app3.pdf]

## 1 Multimedia Appendix 3. Construction of the overall lifestyle score

| Lifestyle area               | Health Norm Division                                 | Score |
|------------------------------|------------------------------------------------------|-------|
| Physical Activity            | Not active (0-2 days of physical activity per week)  | 1     |
|                              | Sub active (3-4 days of physical activity per week)  | 2     |
|                              | Norm active (5-7 days of physical activity per week) | 3     |
| Exercise                     | Not active (0 days of exercise per week)             | 1     |
|                              | Suboptimal active (1 day of exercise per week)       | 2     |
|                              | Norm active ( $\geq 2$ days of exercise per week)    | 3     |
| Healthy Nutrition Behavior   | Lowest tertile of Health Nutrition scores            | 1     |
|                              | Middle tertile of Health Nutrition scores            | 2     |
|                              | Highest tertile of Health Nutrition scores           | 3     |
| Unhealthy Nutrition Behavior | Lowest tertile of Unhealthy Nutrition scores         | 1     |
|                              | Middle tertile of Unhealthy Nutrition scores         | 2     |
|                              | Highest tertile of Unhealthy Nutrition scores        | 3     |
| Smoking status               | Current smoker                                       | 1     |
|                              | Ex-smoker                                            | 2     |
|                              | Non-smoker                                           | 3     |
| Alcohol consumption status   | Frequent drinker ( $\geq 6$ days per week)           | 1     |
|                              | Abstainer                                            | 2     |
|                              | Normal drinker ( $\leq 5$ days per week)             | 3     |
| Sleep status                 | Unhealthy sleeper                                    | 1     |
|                              | Suboptimal sleeper                                   | 2     |
|                              | Healthy sleeper                                      | 3     |
| Stress status                | Lowest tertile of Satisfaction with Life scores      | 1     |
|                              | Middle tertile of Satisfaction with Life scores      | 2     |
|                              | Highest tertile of Satisfaction with Life scores     | 3     |

2

3
